# Supplementary material for: Low-cost, easy-to-build noninvasive pressure support ventilator for under-resourced regions: open source hardware description, performance and feasibility testing
Source: PubMed Central journal article supplement — Eur Respir J. 2020 Jun 4;55(6):2000846. doi: 10.1183/13993003.00846-2020 (PMC7173672; doi:10.1183/13993003.00846-2020), 2020-06-04
Supplement: ERJ-00846-2020.Shareable.pdf [file ERJ-00846-2020.Shareable.pdf]

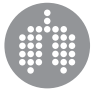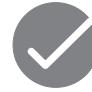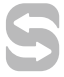

SHAREABLE PDF

# Low-cost, easy-to-build noninvasive pressure support ventilator for under-resourced regions: open source hardware description, performance and feasibility testing

Onintza Garmendia<sup>1,2</sup>, Miguel A. Rodríguez-Lazaro<sup>1</sup>, Jorge Otero<sup>1,3</sup>,  
Phuong Phan<sup>4</sup>, Alexandrina Stoyanova<sup>5</sup>, Anh Tuan Dinh-Xuan <sup>6</sup>, David Gozal <sup>7</sup>,  
Daniel Navajas<sup>1,3,8</sup>, Josep M. Montserrat<sup>2,3,9</sup> and Ramon Farré<sup>1,3,9</sup>

**Affiliations:** <sup>1</sup>Unitat de Biofísica i Bioenginyeria, Facultat de Medicina i Ciències de la Salut, Universitat de Barcelona, Barcelona, Spain. <sup>2</sup>Sleep Lab, Hospital Clinic, Universitat de Barcelona, Barcelona, Spain. <sup>3</sup>CIBER de Enfermedades Respiratorias, Madrid, Spain. <sup>4</sup>Hue Central Hospital, Hue, Vietnam. <sup>5</sup>Dept of Economics, Faculty of Economics and Business, Universitat de Barcelona, Barcelona, Spain. <sup>6</sup>Service de Physiologie-Explorations Fonctionnelles, Hôpital Cochin, Assistance Publique-Hôpitaux de Paris (AP-HP), Paris, France. <sup>7</sup>Dept of Child Health, The University of Missouri School of Medicine, Columbia, MO, USA. <sup>8</sup>Institute for Bioengineering of Catalonia (IBEC), The Barcelona Institute of Science and Technology, Barcelona, Spain. <sup>9</sup>Institut d'Investigacions Biomèdiques August Pi Sunyer, Barcelona, Spain.

**Correspondence:** Ramon Farré, Unitat de Biofísica i Bioenginyeria, Facultat de Medicina i Ciències de la Salut, Casanova 143, 08036 Barcelona, Spain. E-mail: rfarre@ub.edu

 @ERSpublications

**Patients in under-resourced areas cannot be treated by mechanical ventilation given the unaffordable cost of conventional devices; here a low-cost, easy-to-build ventilator with open access details for free replication is designed and tested** <https://bit.ly/34UcbWp>

**Cite this article as:** Garmendia O, Rodríguez-Lazaro MA, Otero J, *et al.* Low-cost, easy-to-build noninvasive pressure support ventilator for under-resourced regions: open source hardware description, performance and feasibility testing. *Eur Respir J* 2020; 55: 2000846 [https://doi.org/10.1183/13993003.00846-2020].

This single-page version can be shared freely online.

## ABSTRACT

**Aim:** Current pricing of commercial mechanical ventilators in low-/middle-income countries (LMICs) markedly restricts their availability, and consequently a considerable number of patients with acute/chronic respiratory failure cannot be adequately treated. Our aim was to design and test an affordable and easy-to-build noninvasive bilevel pressure ventilator to allow a reduction in the serious shortage of ventilators in LMICs.

**Methods:** The ventilator was built using off-the-shelf materials available *via e-commerce* and was based on a high-pressure blower, two pressure transducers and an Arduino Nano controller with a digital display (total retail cost <75 USD), with construction details provided open source for free replication. The ventilator was evaluated, and compared with a commercially available device (Lumis 150 ventilator; Resmed, San Diego, CA, USA): 1) in the bench setting using an actively breathing patient simulator mimicking a range of obstructive/restrictive diseases; and b) in 12 healthy volunteers wearing high airway resistance and thoracic/abdominal bands to mimic obstructive/restrictive patients.

**Results:** The designed ventilator provided inspiratory/expiratory pressures up to 20/10 cmH<sub>2</sub>O,

respectively, with no faulty triggering or cycling; both in the bench test and in volunteers. The breathing difficulty score rated (1–10 scale) by the loaded breathing subjects was significantly ( $p < 0.005$ ) decreased from  $5.45 \pm 1.68$  without support to  $2.83 \pm 1.66$  when using the prototype ventilator, which showed no difference with the commercial device ( $2.80 \pm 1.48$ ;  $p = 1.000$ ).

**Conclusion:** The low-cost, easy-to-build noninvasive ventilator performs similarly to a high-quality commercial device, with its open-source hardware description, which will allow for free replication and use in LMICs, facilitating application of this life-saving therapy to patients who otherwise could not be treated.
